# Supplementary material
Source: PubMed Central journal article supplement (PMC8814682)
Supplement: bloodBLD2021011775-suppl1.pdf [file bloodBLD2021011775-suppl1.pdf]

## Online Supplement

# Autophagy In Mesenchymal Progenitors Protects Mice Against Bone Marrow Failure After Severe Intermittent Stress

Theresa Landspersky<sup>1</sup>, Mehmet Saçma<sup>2</sup>, Jennifer Rivière<sup>1</sup>, Judith S. Hecker<sup>1</sup>, Franziska Hettler<sup>1</sup>, Erik Hameister<sup>3</sup>, Katharina Brandstetter<sup>4</sup>, Rouzanna Istvánffy<sup>1,5</sup>, Sandra Romero Marquez<sup>1</sup>, Romina Ludwig<sup>1</sup>, Marilena Götz<sup>1</sup>, Michèle Buck<sup>1</sup>, Martin Wolf<sup>6</sup>, Matthias Schiemann<sup>7</sup>, Jürgen Ruland<sup>3</sup>, Dirk Strunk<sup>6</sup>, Akiko Shimamura<sup>9</sup>, Kasiani Myers<sup>10</sup>, Terry P. Yamaguchi<sup>11</sup>, Matthias Kieslinger<sup>12</sup>, Heinrich Leonhardt<sup>4</sup>, Florian Bassermann<sup>1,8</sup>, Katharina S. Götze<sup>1,8</sup>, Hartmut Geiger<sup>2</sup>, Christina Schreck<sup>1,13</sup>✉, Robert A.J. Oostendorp<sup>1,13</sup>✉

## Affiliations

1. Technical University of Munich. School of Medicine. Clinic and Polyclinic for Internal Medicine III. Laboratory of Stem Cell Physiology, 81675 Munich, Germany
2. Institute of Molecular Medicine, Ulm University, 89081 Ulm, Germany.
3. Technical University of Munich. School of Medicine. Clinical Chemistry and Pathobiochemistry, 81675 Munich, Germany
4. Human Biology and BioImaging, Faculty of Biology, Ludwig-Maximilians-Universität München, 81377 Munich, Germany.
5. Current address: Technical University of Munich, Klinikum rechts der Isar, Department of Surgery, 81675 Munich, Germany
6. Institute of Experimental and Clinical Cell Therapy, Paracelsus University Salzburg, 5020 Salzburg, Austria
7. Technical University of Munich (TUM), Institute for Medical Microbiology, Immunology and Hygiene, CyTUM-MIH, 81675 Munich, Germany
8. German Cancer Consortium (DKTK), 69120 Heidelberg, Germany
9. Bone Marrow Failure and MDS Program, Dana Farber and Boston Children's Hospital, Boston, MA 02115, USA
10. Division of Bone Marrow Transplantation and Immune Deficiency, Cincinnati Children's Hospital Medical Center, Cincinnati, OH, USA
11. Cancer and Developmental Biology Laboratory, Center for Cancer Research, National Cancer Institute-Frederick, NIH, Frederick, MD 21702, USA.
12. Department for Small Animals and Horses, University of Veterinary Medicine, 1210 Vienna, Austria

## **Methods to the supplementary Figures**

### **Colony-forming unit fibroblast (CFU-F) assay**

Fibroblastic colony-forming units (CFU-F) were assessed from sorted primary MSPCs (100 cells/cm<sup>2</sup>) or cultured MSPCs (300 cells/cm<sup>2</sup>). For this, MSPCs were plated on 0,1% gelatine-coated well plates in MEM Alpha (with Ribosides and Glutamax, Life Technologies), supplemented with 10% Fetal Calf Serum (FCS, PAA), antibiotics, and 0,1% β-Mercapto-ethanol (Invitrogen). Adherent fibroblast-like colonies were microscopically enumerated after four days (cultured MSPCs) or two weeks (primary sorted MSPCs).

### **Long-term culture of MSPCs**

For determination of growth curves, MSPCs were cultured for at least 8 passages. Growing cells were passaged at approximately 70% confluence and reseeded at a density of 1x10<sup>3</sup> cells/cm<sup>2</sup>. Cumulative population doublings (PD) were calculated from the number of cells seeded and the number of cells harvested at the next passage as described previously <sup>1</sup>.

### **Differentiation assay**

Adipogenic and osteogenic potential of MSPCs was determined using commercially available differentiation media as described by the manufacturer (StemXVivo®; R&D Systems). For staining, cells were rinsed with PBS and fixed in 10% paraformaldehyde (PFA) for 15 min at RT. Adipogenic potential was determined by staining with Oil Red O and visual examination and quantitation using propanol-extracted dye and measurement at 520 nm. Osteogenic potential was determined by Alizarin Red S staining with visual

examination and quantitation using destaining solution (10% Cetylpyridiumchloride in 10 mM Sodiumphosphate (pH 7.0))-eluted dye measurement at 562 nm.

### **Cytomorphology**

BM smears were stained with May Grunwald and Giemsa staining.

### **Treatment with pharmacological compounds and rWNT5A.**

*In vitro*: to inhibit CDC42 activation, we used the CDC42/RhoGDI inhibitor CASIN (8-Cyclopentyl-2,3,3a,4,5,6-hexahydro-1H-pyrazino[3,2,1-jk]carbazole; TOCRIS) as described in Liu et al. <sup>2</sup>. We also used the GTP-competitive CDC42-GTP inhibitor ML-141 ((4-[3-(4-methoxyphenyl)-5-phenyl-3,4-dihydropyrazol-2-yl] benzenesulfon-amide; TOCRIS)).

MSPCs were treated with inhibitors at 5 $\mu$ M or 0.01% DMSO for 4 hrs. Subsequently, cells were fixed with 4% paraformaldehyde (PFA) for 5 min for immunofluorescence (IF) staining. For autophagy measurements, WT MSPCs were treated with rapamycin (1 $\mu$ M), chloroquine (10 $\mu$ M), CASIN (5 $\mu$ M), or DMSO for 16 hrs.

In some experiments, MSPCs were treated with recombinant murine WNT5A (rWNT5A), a low dose of 100 ng/ml rWNT5A (R&D Systems) was added to MSPCs at 2 consecutive days, 24 hrs apart.

### ***In vitro* treatment with stress inducers**

To show MSPC responses to different types of stress, compact bone-derived MSCs (P4) were spotted on chamber slides and treated with poly(I:C) (100 $\mu$ M, Apexbio) for 4 h or with 5-FU (15 $\mu$ M, Ribosepharm) for 16 hrs. For the irradiation experiment, the cells were irradiated with 15 Gy (gamma-irradiation). Cells were fixed and analyzed by IF microscopy as described below.

### **AnnexinV staining**

Apoptosis in compact bone-derived MSCs was determined using AnnexinV staining in combination with propidium iodide (PI). For this purpose, cells were suspended in AnnexinV binding buffer (14 mM NaCl, 10  $\mu$ M Hepes and 2.5 mM CaCl<sub>2</sub>) plus AnnexinV-FITC (eBioscience) and PI (1 $\mu$ g/ml) and incubated for 15 min at 4°C. Additionally, cells were stained with CD31, CD166/Alcam and SCA-1 antibodies (Supplementary Table 3). Staining of cells were analyzed by flow cytometry on a CyAn ADP LxP8.

### **Analysis of immunofluorescent labeled cells**

To determine total protein content, the number of pixels per cell was assessed using ImageJ software (v1.52). Pictures within one experiment were taken under standardized conditions (light intensity, exposure, diaphragm).

To determine stress fiber formation, each field was counted for 1) the total number of cells; 2) the number of cells that display stress fibers and 3) the number of cells that showed weaker formation (intermediate) or no formation.

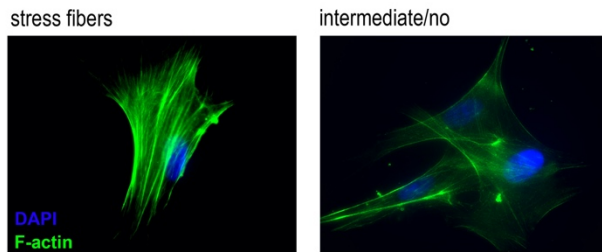

The figure below shows MSCs with stress fiber formation (left) and intermediate /no (right).

For mean fluorescence intensity, the average intensity of pixels per cell was determined.

For foci analysis, the contrasts were visible by black and white processing within the digital images (Affinity Photo, Serif Europe Ltd). After threshold setting, cell structures were selected and counted automatically using ImageJ software.

For diameter analysis, contrasts were visualized using relief filters (Adobe Photoshop, Version 21.1.1). After threshold setting, cell structures were selected and length was determined using ImageJ software.

Colocalization was assessed using ImageJ after picture processing by selection of single cells, background subtraction with the rolling ball algorithm, and threshold adjustment by the autothresholding method “Moment”. The ImageJ “Colocalization” plugin was then used to recover the overlapping pixels of two analysed proteins. The pixel area occupied were then collected by using the “Analyse particles” function. To identify colocalization bias either in nuclear proximity or the cytoplasm, the DAPI signal was used to delimit the nuclear area and the nuclear and cytoplasmic fractions were reported separately.

## Supplementary Figures

**A** Gating scheme HSC (post 5-FU)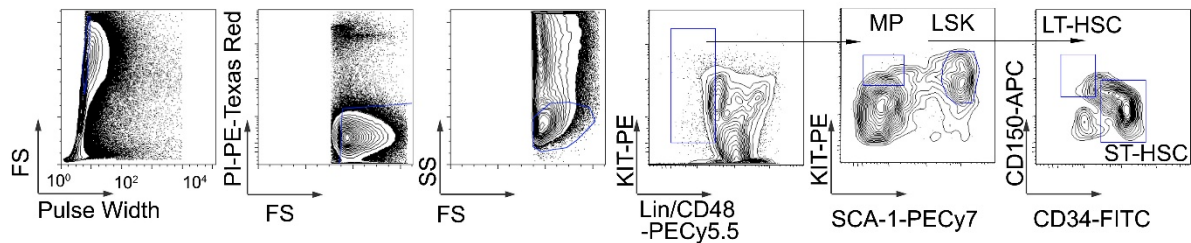**B** Gating scheme MSPC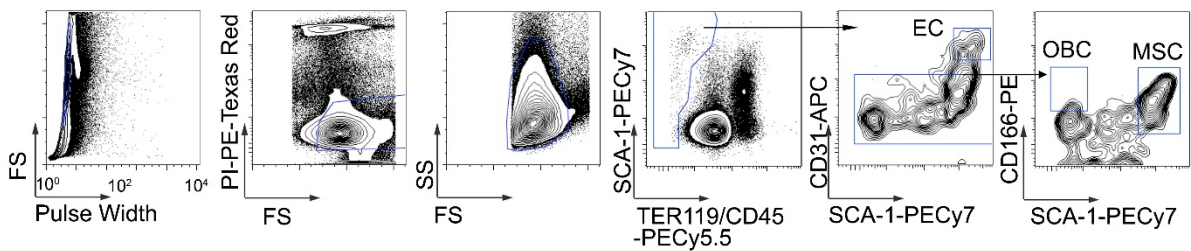

**Figure S1. Gating strategies for HSCs and MSPCs flow cytometry and sorting.** **A**, Representative gating strategy for HSCs after 5-FU treatment. Left graph: cells were gated for Pulse Width to avoid cell doublings and to remove cell clumps. The second graph (from left) shows the viability gate to eliminate dead cells ( $PI^+$  cells). The third gate (from left) is used to identify cells based on size (FS) and granularity (SS). Lineage $^-$  CD48 $^-$  cells were gated in the fourth graph (from left). In the fifth gate (from left) MPs (Lineage $^-$  SCA-1 $^-$  KIT $^+$ ) and LSKs (Lineage $^-$  SCA-1 $^+$  KIT $^+$ ) cells were separated. The right graph shows LT-HSCs (CD34 $^-$  CD150 $^+$  CD48 $^-$  LSK cells) and ST-HSCs (CD34 $^+$  CD150 $^{low}$  CD48 $^-$  LSK cells). **B**, Representative gating strategy for stromal subpopulations. Cells were separated due to cell doublings, viability, size and granularity (graph 1-3 from left). Next, non-hematopoietic (CD45 $^-$  TER119 $^-$ ) cells were further gated as ECs (CD31 $^+$  SCA-1 $^+$ ), MSCs (CD31 $^-$  SCA-1 $^+$  Alcam $^{low}$ ) and OBCs (CD31 $^-$  SCA-1 $^-$  Alcam $^+$ ).

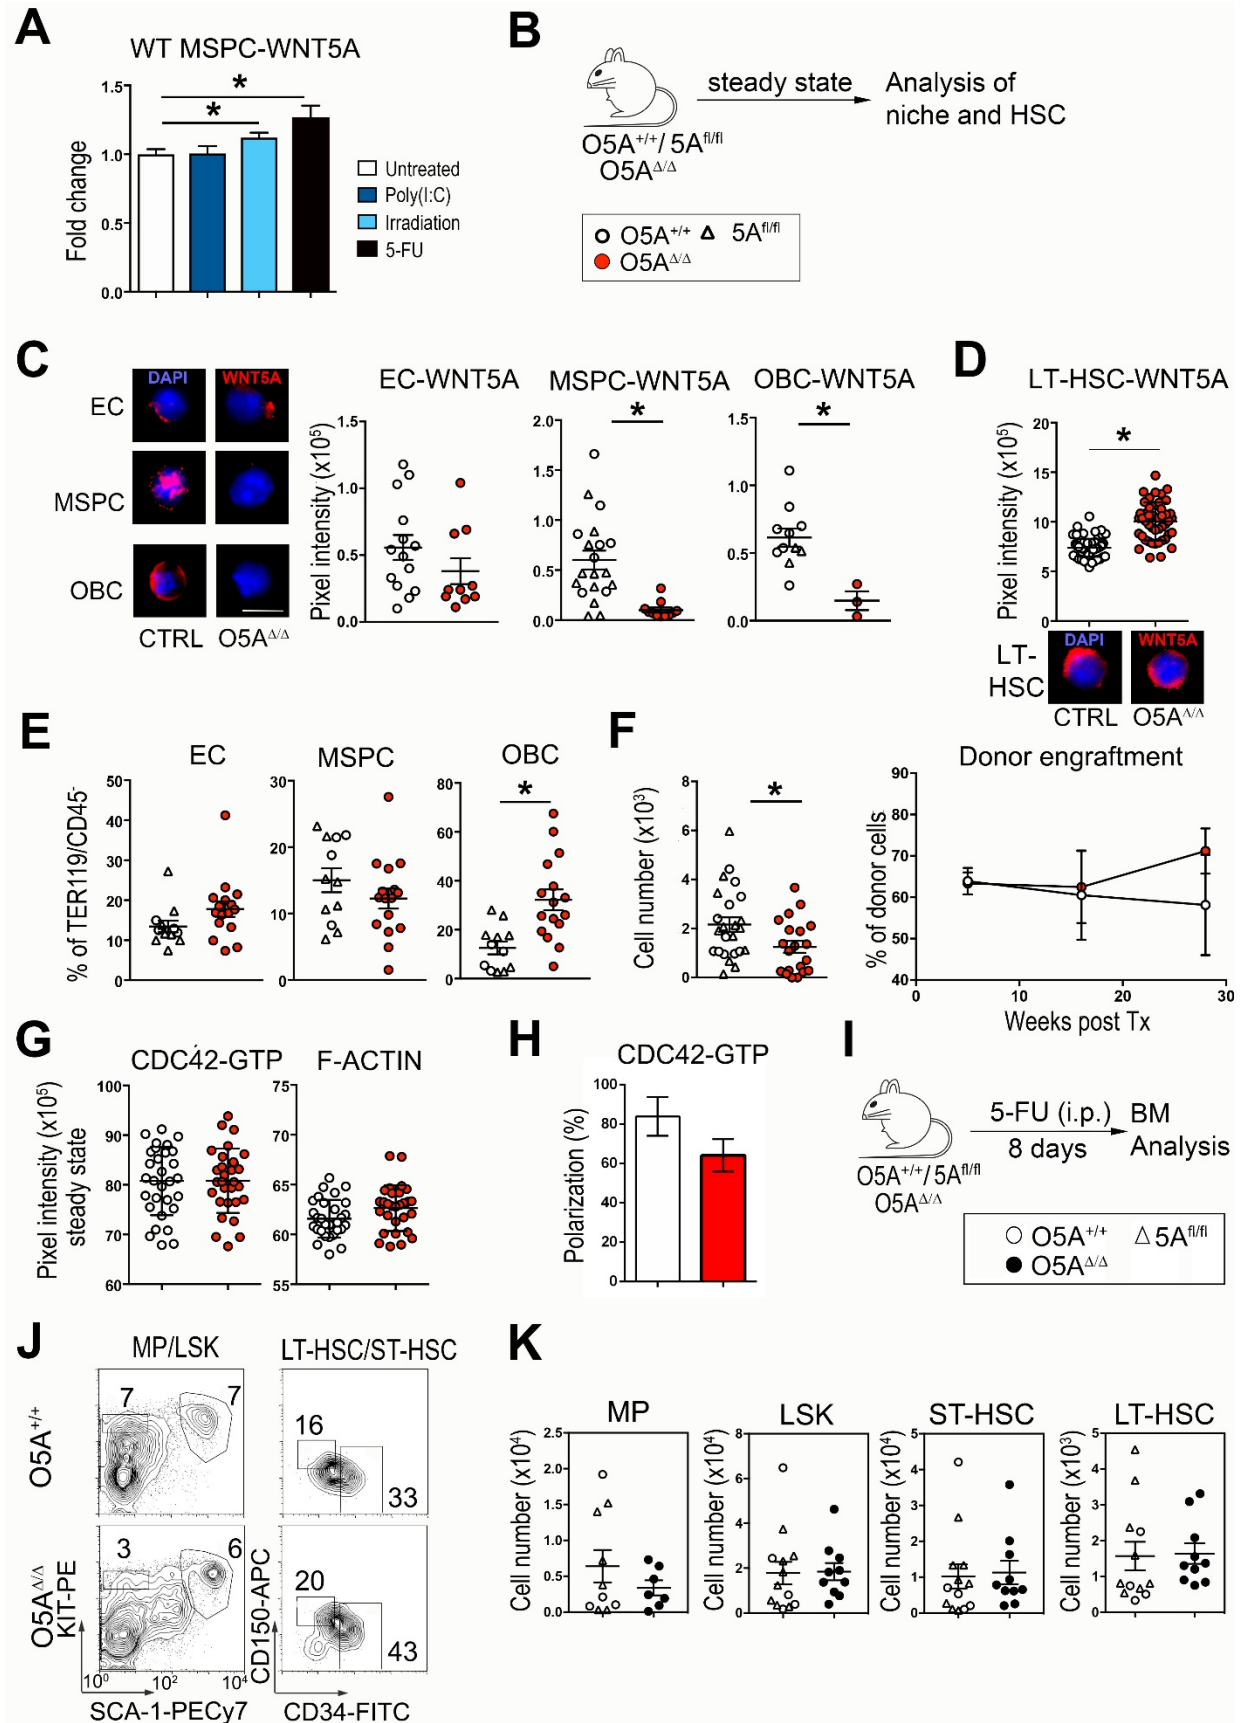

**Figure S2. Niche cells and hematopoiesis in control and O5A<sup>Δ/Δ</sup> mice.** **A**, Graph shows fold change of untreated and treated WT MSPCs stained for WNT5A in IF assay. MSPCs (P4) were treated with poly(I:C), irradiated (15 Gy) or 5-FU. Pixel intensity measured by ImageJ software. **B**, Dissection of mice with the following genotypes: Control (CTRL): O5A<sup>+/+</sup> n=11, 5A<sup>fl/fl</sup> n=13 and O5A<sup>Δ/Δ</sup> n=18. Analysis of niche populations and HSCs. **C**, Fluorescent microscopy images of WNT5A (red) and DAPI (blue) staining in sorted endothelial cells (CD31<sup>+</sup> ECs) (left), mesenchymal stromal cells (CD31<sup>-</sup>, Alcam<sup>med</sup>/SCA-1<sup>+</sup>) (middle) and osteoblastic cells (CD31<sup>-</sup>, Alcam<sup>+</sup>/SCA-1<sup>-</sup>OBCs) (right). **D**, Graph showing the pixel intensity of WNT5A expression in sorted LT-HSCs, measured by ImageJ software. Fluorescent microscopy images of WNT5A (red) and DAPI (blue) staining in sorted LT-HSCs. **E**, Percentage of ECs, MSPCs and OBCs; Flow cytometry gating strategy in Figure S1. **F**, Graph showing the cell numbers of LT-HSCs during steady state analysis. Primary transplantation (Tx) of 300 sorted LT-HSCs from 8-10 weeks old mice into lethally irradiated 129\*Ly5.1 WT recipients. Experimental groups: O5A<sup>Δ/Δ</sup>, n=3. CTRL: O5A<sup>+/+</sup> n=4 and 5A<sup>fl/fl</sup> n=2. Graph showing the donor engraftment in PB. **G**, Graphs showing the pixel intensity of CDC42-GTP and F-Actin expression in sorted LT-HSCs, measured by ImageJ software. **H**, Percentage of all sorted LT-HSCs with polar distribution of CDC42-GTP (n=30, two independent experiments), measured by ImageJ software. **I**, Experimental design for intraperitoneal (i.p.) injection of 5-FU in mice with the following genotypes: CTRL: O5A<sup>+/+</sup>, n=5, 5A<sup>fl/fl</sup>, n=7 and O5A<sup>Δ/Δ</sup>, n=10. Analysis of LT-HSCs 8 days after treatment. **J**, Representative FACS plots of the BM. **K**, Graphs showing the absolute numbers of multipotent progenitors (Lin/CD48<sup>-</sup>, KIT<sup>+</sup>, SCA-1<sup>-</sup>, MPs/left), LSKs (Lin/CD48<sup>-</sup>, KIT<sup>+</sup>, SCA-1<sup>+</sup>/ middle left), short-term HSCs (Lin/CD48<sup>-</sup>, KIT<sup>+</sup>, SCA-1<sup>+</sup>, CD34<sup>+</sup>, CD150<sup>-</sup>, ST-HSCs/middle right) and long-term HSCs (CD34<sup>-</sup>, CD150<sup>+</sup> (LT-HSCs/right). Scale bars, 5μm \* p-value < 0.05 (Non parametric Mann-Whitney test: A, C-H). The steady state and 5-FU analysis represent three independent experiments. Data are represented as mean ± SEM. The Tx experiment was performed once. Symbol legends in S2A, S2B and S2I.



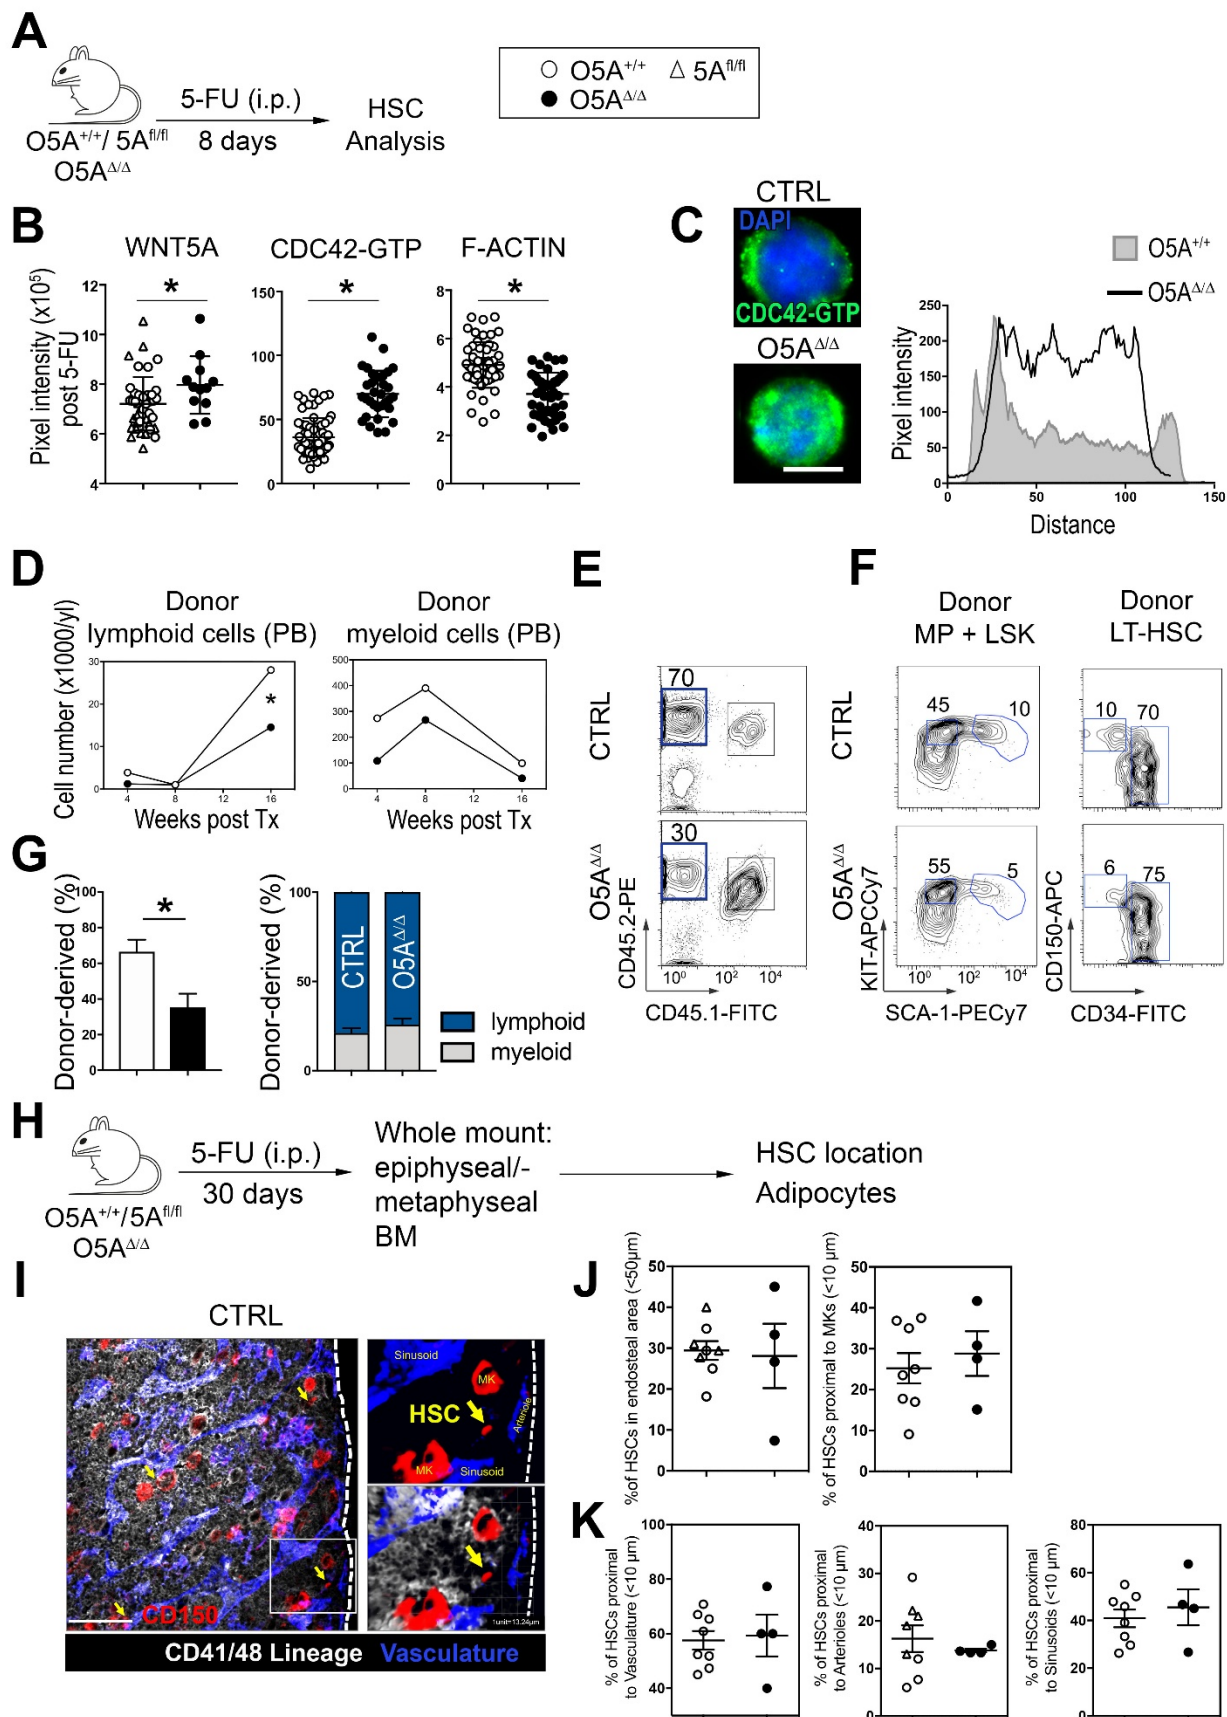

**Figure S3. HSC and niche cell analysis of 5-FU-treated O5A<sup>ΔΔ</sup> mice. Related to Figure 1. A,** Experimental design for intraperitoneal (i.p.) injection of 5-FU in mice with the following genotypes: Control (CTRL): O5A<sup>+/+</sup>, n=5, 5A<sup>fl/fl</sup>, n=7 and O5A<sup>ΔΔ</sup>, n=10. Analysis of HSCs 8 days after treatment. **B,** Graphs showing the pixel intensity of WNT5A, CDC42-GTP and F-Actin expression in sorted LT-HSCs post 5-FU treatment measured by ImageJ software. **C,** Representative immunofluorescence pictures of CDC42-GTP in LT-HSCs and graph showing protein distribution within the cell. **D,** Transplantation (Tx) of 300 sorted LT-HSCs 8 days after 5-FU injection into lethally irradiated 129\*Ly5.1 WT recipients. Experimental groups: O5A<sup>ΔΔ</sup>, n=7. CTRL: O5A<sup>+/+</sup>, n=5 and 5A<sup>fl/fl</sup>, n=4. Graphs showing the absolute numbers of donor lymphoid cells (left) and donor myeloid cells (right) in peripheral blood (PB) at different time points. **E,** Representative FACS plots for CD45.2 donor cell engraftment in BM. **F,** Representative FACS plots for donor MPs/LSKs (left panels), and LT-HSCs (right panels). **G,** Graphs showing summary of bone marrow (BM) engraftment (left panel) and relative contribution of mature myeloid and lymphoid cells to the engrafted populations (right). **H,** Experimental design for histological evaluation of BM niche cells (see also Figure 1). I.p. injection of 5-FU in mice with the following genotypes: CTRL: O5A<sup>+/+</sup> n=2, 5A<sup>fl/fl</sup> n=2 and O5A<sup>ΔΔ</sup> n=2. BM analysis 30 days after treatment. **I,** Stacked whole-mount images from epiphyseal/metaphyseal BM. FABP4<sup>+</sup> vasculature is shown in blue. CD150 is shown in red, other hematopoietic markers (CD41, CD48 and lineage) are in grey. The dashed lines denote the endosteum. Zoom-out: Stacked whole-mount BM image. Zoom-in: 3D reconstructions. Scale Bar: 100μm. **J,** Graphs showing the percentage of HSCs in endosteal area (n=455 HSCs), proximal to megakaryocytes (MKs) (n=583 HSCs), **K,** proximal to vasculature/to arterioles/to sinusoids (n=610 HSCs). Analyzed from 2 mice each group, femora. Scale bars, 5μm \* p-value < 0.05 (Two-sided parametric student's t test: B, D, G, J and K). Data are represented as mean ± SEM. The analysis represents the results of two independent experiments. Symbol legend shown in Figure S3A.

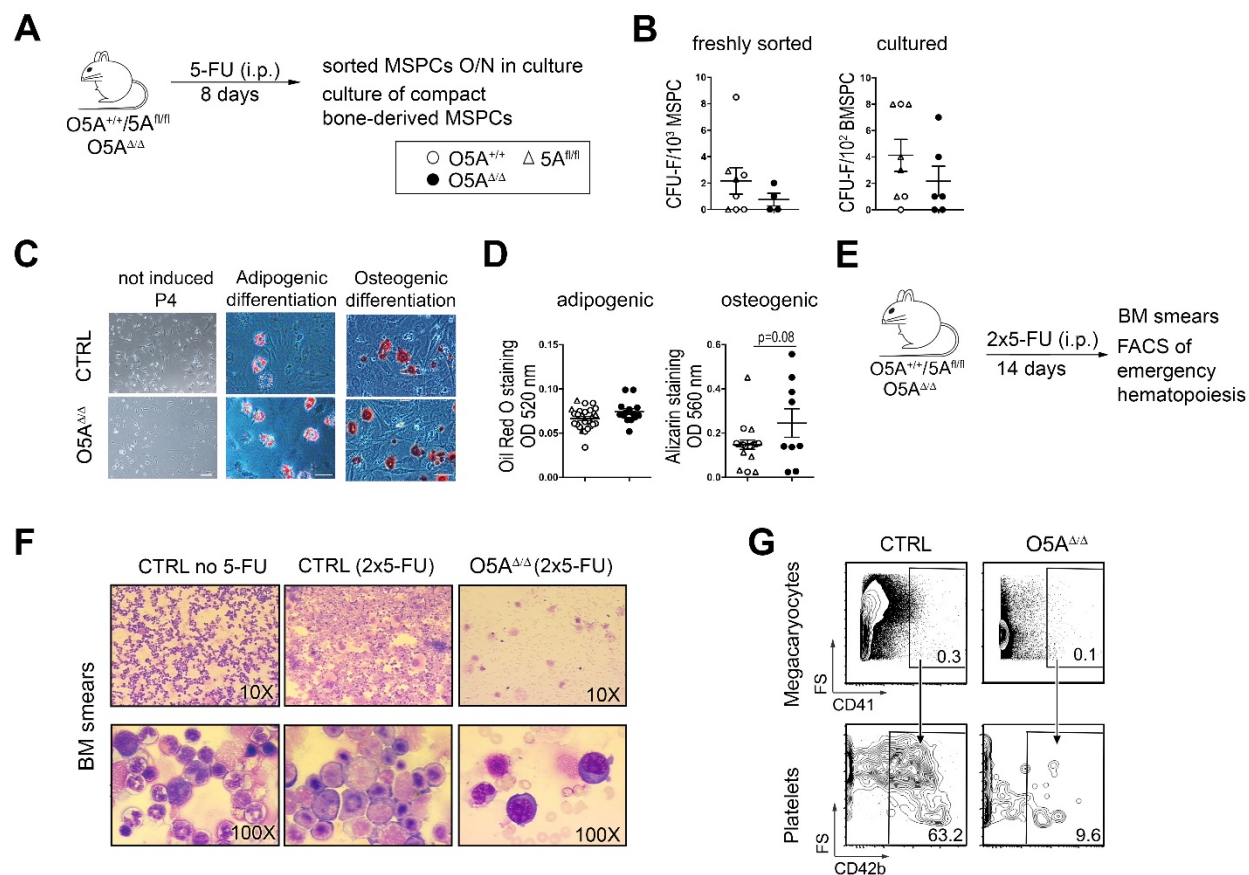

**Figure S4. Niche analysis of 5-FU-treated  $O5A^{\Delta/\Delta}$  mice. Related to Figure 1.** **A**, Experimental design for intraperitoneal (i.p.) injection of 5-FU in mice with the following genotypes: Control (CTRL):  $O5A^{+/+}$ ,  $n=5$ ,  $5A^{fl/fl}$ ,  $n=3$  and  $O5A^{\Delta/\Delta}$ ,  $n=4$ . Niche analysis 8 days after treatment. **B**, Counted CFU-F numbers of freshly sorted ( $TER119/CD45^-$   $CD31^-$   $CD51^+$   $Alcam^{med}$   $SCA-1^+$  immature MSCs (P0/left) and compact bone-derived cultured MSCs (p4/right). **C**, Representative microscope pictures of MSCs (p4) in culture (not induced, left panels), after induction of adipogenic differentiation (middle panels) or osteogenic differentiation (right panels). **D**, Graphs showing adipogenic potential (left) and osteogenic potential (right) of compact bone-derived cultured MSCs (P4) of both genotypes. **Bone marrow failure of 5-FU-treated  $O5A^{\Delta/\Delta}$  mice. Related to Figure 2.** **E**, Experimental design for analysis of mice after two consecutive 5-FU treatments (day 0 and 8). CTRL:  $O5A^{+/+}$ ,  $n=7$ ,  $5A^{fl/fl}$ ,  $n=11$  and  $O5A^{\Delta/\Delta}$ ,  $n=11$ . **F**, Representative pictures from BM smears from untreated CTRL (no 5-FU), and serial 5-FU treated controls and  $O5A^{\Delta/\Delta}$  mice stained with May Grünwald and Giemsa staining. The bone marrow of 5-FU-treated control mice is hypercellular and dominated by erythropoietic cells. Erythropoiesis and granulopoiesis are both left-shifted, with almost no maturing cells beyond the basophilic erythroblast and the myelocyte, respectively. Megakaryocytes are elevated. In contrast,  $O5A^{\Delta/\Delta}$  BM is extremely hypocellular. Only a few cells from the granulopoietic or erythropoietic lineage are visible. **G**, Representative FACS plots of emergency hematopoiesis in BM cells. CD41<sup>+</sup> CD42<sup>+</sup> Megakaryocytes. Scale bars, 10  $\mu$ m \*  $p$ -value < 0.05 (non-parametric Mann-Whitney test: B and D). Data are represented as mean  $\pm$  SEM. The 5-FU analysis and the consecutive 5FU analysis represent two to three independent experiments. Symbol legend shown in Figure S4A.

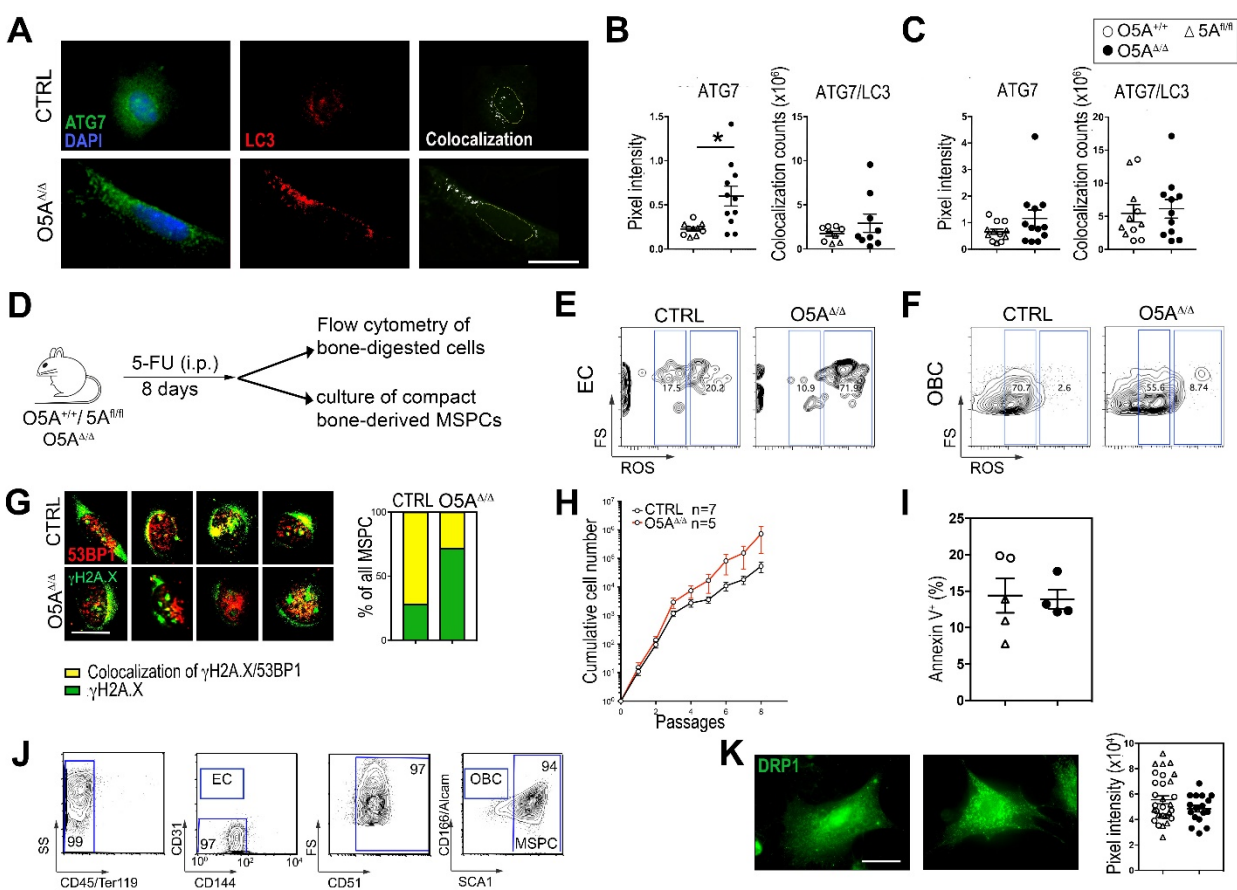

**Figure S5. Autophagosome formation in mouse MSCs of 5-FU-treated O5A<sup>Δ/Δ</sup> mice. Related to Figure 3.** **A**, Representative immunofluorescence pictures of ATG7 (green) and LC3 (red) and colocalization of ATG7/LC3 (white) in sorted MSCs cultured O/N (P0). **B**, Graphs showing the pixel intensity of ATG7 (left) and colocalization of ATG7/LC3 (right) in sorted MSCs cultured O/N (P0). **C**, Graphs showing the pixel intensity of ATG7 (left) and colocalization of ATG7/LC3 (right) in isolated and cultured compact bone-derived MSCs (P4). **Characterization of compact bone-derived MSCs (P4). Related to figure 4.** **D**, Experimental design as in previous Figures. Isolation and culture of compact bone-derived MSCs. Control (CTRL): O5A<sup>+/+</sup>, n=5, 5A<sup>fl/fl</sup>, n=7 and O5A<sup>Δ/Δ</sup>, n=10. **E**, **F**, Representative FACS plots of H<sub>2</sub>DCFDA (ROS) detection in ECs (**E**) and OBCs (**F**) of CTRL (left) and O5A<sup>Δ/Δ</sup> (right) mice. **G**, Representative immunofluorescence pictures of γH2A.X (green) and 53BP1 (red) in compact bone-derived MSCs (P4). Graph showing percentages of colocalized foci (yellow) and γH2A.X foci (green). The statistical analysis of colocalization shows a p-value of 0.09. **H**, Growth curve showing MSCP growth of CTRL (n=7) and O5A<sup>Δ/Δ</sup> (n=5) until passage 8. **I**, Graph showing percentages of annexinV<sup>+</sup> (apoptotic and dead cells) of compact bone-derived MSCs (P4) after trypsin digestion. **J**, Representative FACS plots of compact bone-derived MSCs in culture (P4). **K**, Representative immunofluorescence pictures of DRP1 (green) in compact bone-derived MSCs (P4) and graph showing the pixel intensity of protein content. Scale bars, 10μm. \* p-value < 0.05 (Two-sided parametric student's t test: B, C, H, I, K). Data are represented as mean ± SEM. The analysis represents two to three independent experiments, except for the growth curve that represents one experiment with MSCs from 4 donor mice grown in separate cultures. Symbol legend shown in Figure S5C.

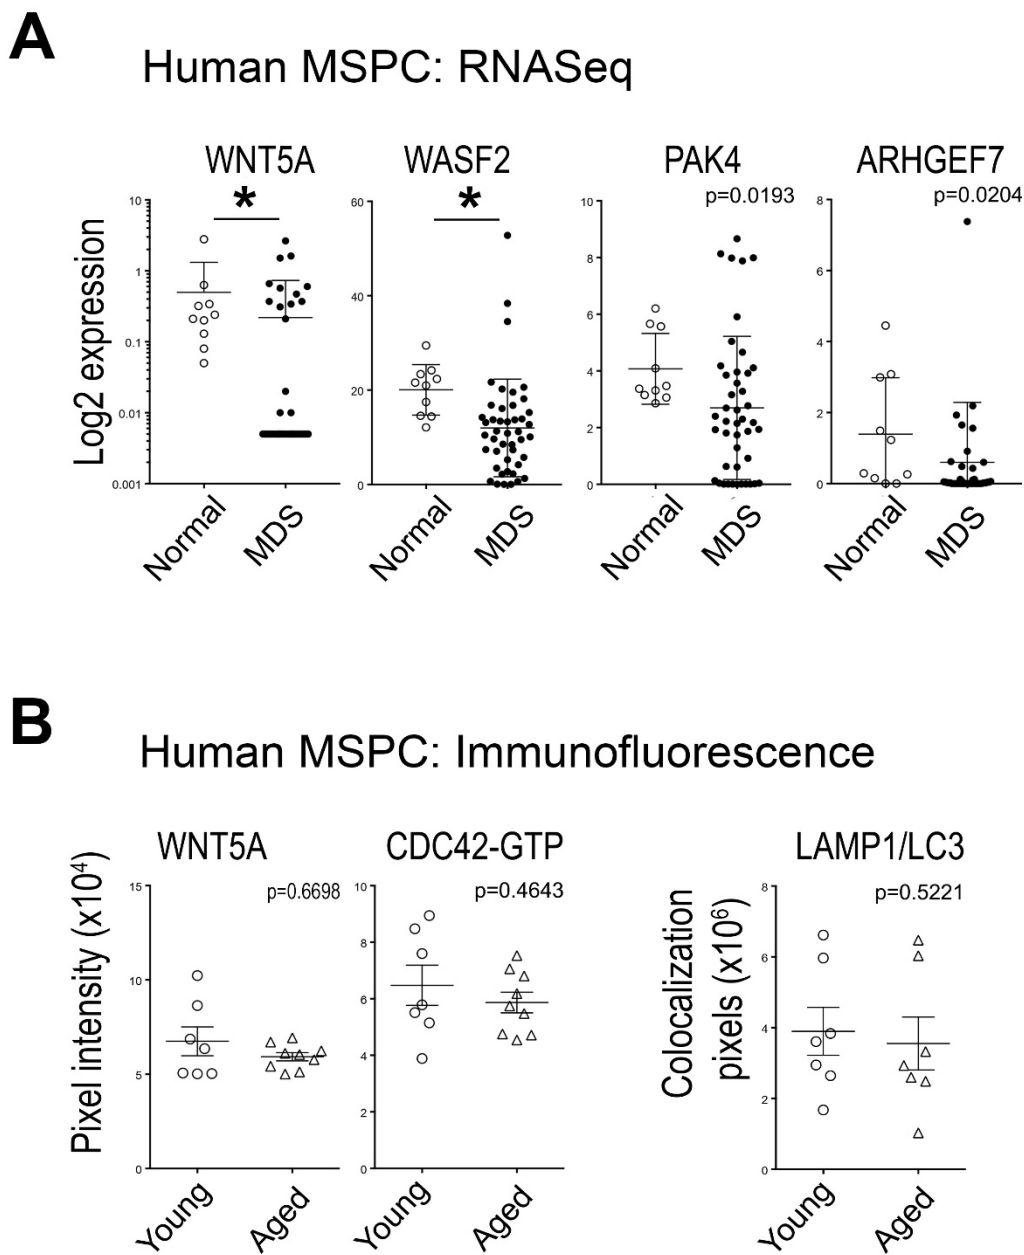

**Figure S6. WNT5A-signaling in human MSCs. Related to Figure 5. A**, RNASeq analysis of human MSCs of MDS patients ( $n=45$ ) compared to healthy individuals ( $n=10$ ). Left graph shows WNT5A expression. No WNT5A expression in MDS patients:  $n=33$ . Normalized gene expression data were taken from the analysis of Zambetti et al.<sup>3</sup> **B**, Pixel intensity of human MSCs stained for WNT5A, CDC42-GTP and colocalization of LAMP1 and LC3 measured with ImageJ software. Each symbol represents the average of 30 cells. A: adjusted  $p$ -value  $< 0,0071$  (Non parametric Mann-Whitney test), B:  $p$ -value  $< 0.05$  (Non parametric Mann-Whitney test). Data are represented as mean  $\pm$  SEM.

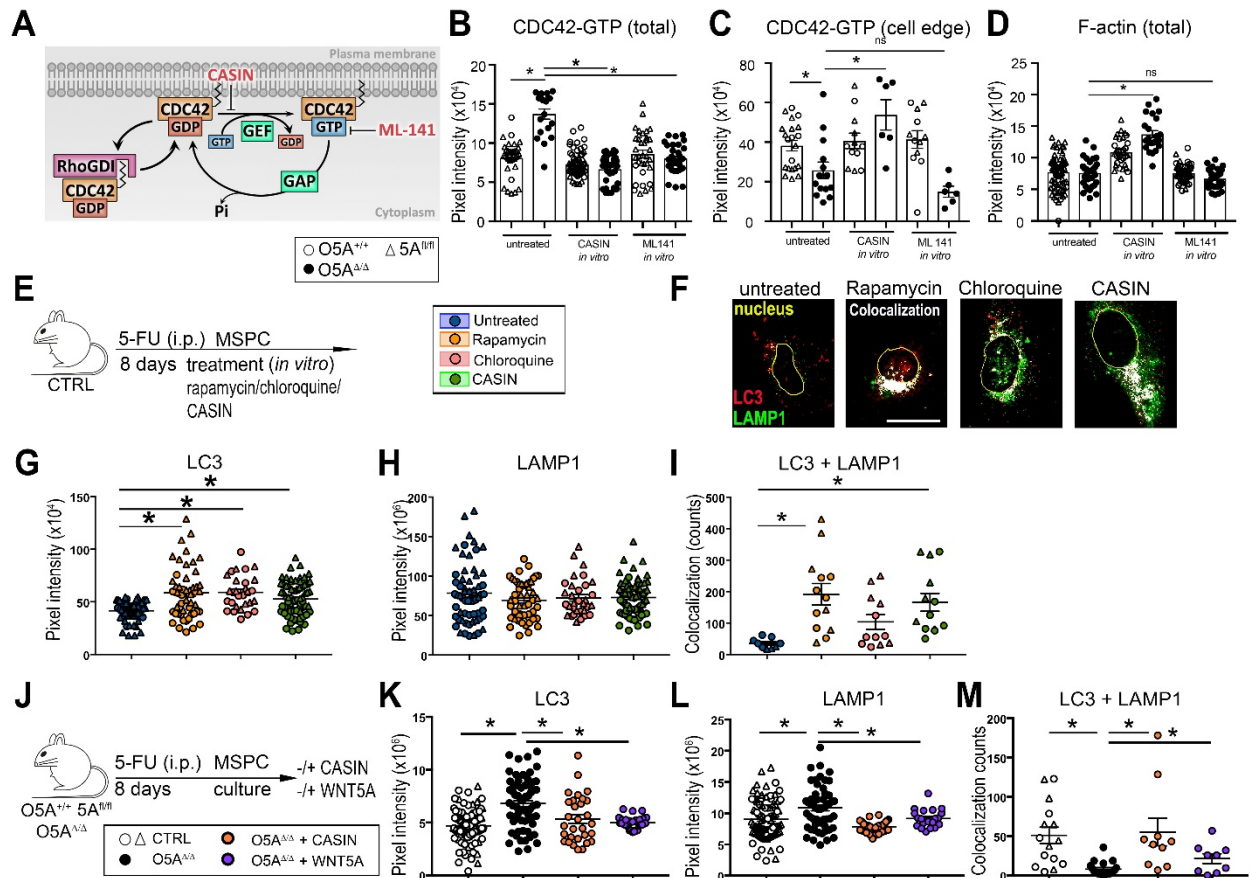

**Figure S7. Autophagic rescue in MSCs of 5-FU-treated  $O5A^{\Delta/\Delta}$  MSCs. Related to Figure 6. A, Inhibitors of CDC42, CASIN (CDC42-GDP/RhoGDI inhibitor) and ML141 (competitive CDC42-GTP inhibitor) and possible mechanisms (modified from <sup>4</sup>). B, C and D, In vitro treatment of MSCs cultured from compact bones of 5-FU-treated mice with different genotypes. MSCs were treated with CASIN (5 $\mu$ M) or ML141 (5 $\mu$ M) for 1 h in vitro, washed and stained for either an antibody against CDC42-GTP (B, C) or F-actin (Phalloidin, D). Fluorescent intensity staining (either total or at the cell edge) was assessed using ImageJ software. One representative experiment of three experiments is shown. E, Experimental design of MSC culture from 5-FU-treated Control (CTRL) mice. In vitro treatment with rapamycin, chloroquine, or CASIN. F, Fluorescent microscopy images of LC3 (red) and LAMP1 (green). Colocalization shown in white measured by ImageJ software (plugin colocalization). G, H, I, Graphs showing colocalization counts (I) and pixel intensity of LAMP1 (H) and LC3 (G) measured by ImageJ software. J, Experimental design of MSC culture from 5-FU-treated CTRL and  $O5A^{\Delta/\Delta}$  mice. In vitro treatment with CASIN or rWNT5A. K, L, M, Graphs showing colocalization counts (M) and pixel intensity of LAMP1 (L) and LC3 (K) measured by ImageJ software. Scale bars, 10 $\mu$ m. \* p-value < 0.05 (Non parametric Mann-Whitney test: B-D, G-I, K-M). Data are represented as mean  $\pm$  SEM. Symbol legends shown in Figure S7A, S7E and S7J.**

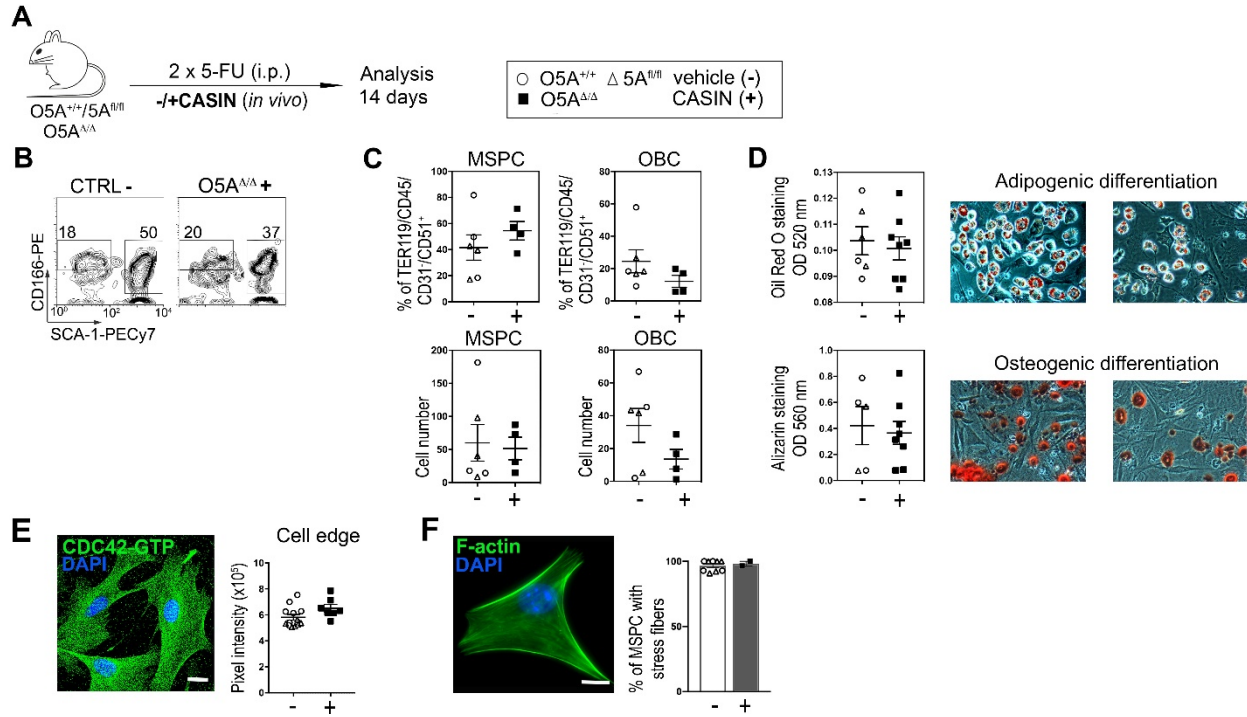

**Figure S8. CDC42-GTP inhibition rescues hematopoiesis and niche remodeling. Related to Figure 6.** **A**, Experimental design for serial intraperitoneal (i.p.) injection (d0 and d8) of 5-FU and additional serial inhibitor CASIN (+) injection or vehicle (PBS + 15% ethanol (-)) (d5,6,7,8) in mice with the following genotypes: Control (CTRL): O5A<sup>+/+</sup>, n=6, 5A<sup>fl/fl</sup>, n=7 and O5A<sup>Δ/Δ</sup>, n=7. Hematopoiesis and niche analysis 14 days after first 5-FU injection (d14). **B**, Representative FACS plots for OBCs (CD31<sup>-</sup> SCA-1<sup>-</sup> Alcam<sup>+</sup>) and MSPCs (CD31<sup>-</sup> SCA-1<sup>+</sup> Alcam<sup>low</sup>). **C**, Graphs showing the percentages and absolute numbers of MSPCs and OBCs. **D**, Graphs showing the adipogenic (upper panel) and osteogenic (lower panel) differentiation potential of cultured compact bone-derived MSPCs (P4). Representative pictures of oil red staining (upper panel) and alizarin red staining (lower panel). **E**, Representative fluorescent microscopy image of CDC42-GTP (green) and DAPI (blue) staining in MSPCs from O5A<sup>Δ/Δ</sup> CASIN treated (+) mice. Graph showing the pixel intensity of CDC42-GTP at the cell edge. **F**, Representative fluorescent microscopy image of F-actin (green) and DAPI (blue) staining in MSPCs from O5A<sup>Δ/Δ</sup> CASIN treated (+) mice. Graph showing percentage of MSPCs with stress fibers. Scale bars, 10μm \* p-value < 0.05 (Non parametric Mann-Whitney test: C-F). Data are represented as mean ± SEM. The analysis represents two independent experiments. Symbol legend shown in Figure S8A.

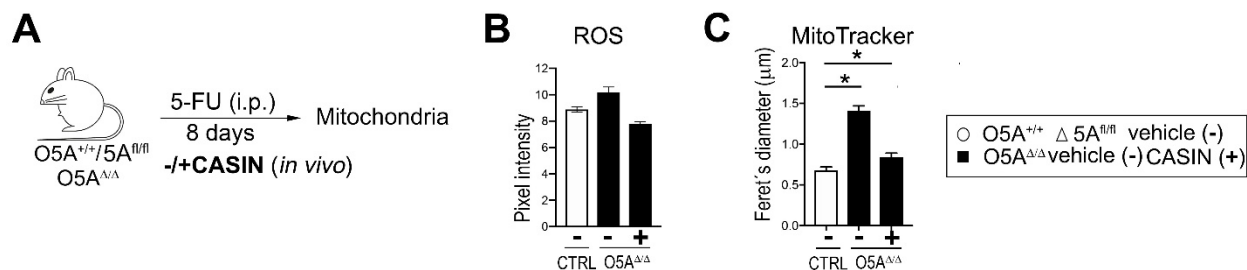

**Figure S9. Mitochondria after in vivo 5-FU and CASIN treatment. Related to Figure 7. A,** Experimental design for intraperitoneal (i.p.) injection of 5-FU in mice with the following genotypes: Control (CTRL): O5A<sup>+/+</sup>, n=10, 5A<sup>fl/fl</sup>, n=10 and O5A<sup>Δ/Δ</sup>, n=9. Additional in vivo i.p. injection of CDC42-GTP inhibitor CASIN (+) or vehicle (PBS + 15% ethanol (-)) at day 5-8 (d5,6,7,8). Analysis of mitochondrial metabolism in cultured MSPCs. **B,** Graph showing the pixel intensity of H<sub>2</sub>DCFDA (ROS) in MSPCs with inhibitor treatment compared to vehicle treatment. **C,** Graph showing the results of MitoTracker Red staining designated as feret's diameter and measured by ImageJ software. \*p-value < 0.05 (Two-sided parametric student's t test: B and C). Data are represented as mean ± SEM. The analysis represents two independent experiments. Symbol legend shown in Figure S9C.



## Supplementary Table 1

| Experimental Models: Organisms/Strains                     |                                                                                   |              |
|------------------------------------------------------------|-----------------------------------------------------------------------------------|--------------|
| Mouse: Osx-Cre: O5A <sup>+/+</sup>                         | Jackson Labs                                                                      | MGI: 006361  |
| Mouse: Wnt5a <sup>fl/fl</sup> : 5A <sup>fl/fl</sup>        | Miyoshi et al., 2012                                                              | MGI: 5440733 |
| Mouse: C57BL/6.J Wnt5a <sup>fl/+</sup>                     | ZPF, MRI                                                                          | MGI: N/A     |
| Mouse: C57BL/6.J Wnt5a <sup>Δ/Δ</sup> : O5A <sup>Δ/Δ</sup> | ZPF, MRI                                                                          | MGI: N/A     |
| Mouse: 129S2: 129S2/SvPasCrl                               | Jackson Labs                                                                      | MGI: 3587894 |
| Mouse: Ly5.1: B6.SJL-Ptprca.Pep3b/BoyJ: B6 Cd45.1          | Jackson Labs                                                                      | MGI: 2164701 |
| Oligonucleotides used for genotyping                       |                                                                                   |              |
| Wnt5A_Cond_F:<br>TCTCGGAAGGTACTGCTATCTCCTACC               | Miyoshi et al., 2012                                                              | N/A          |
| Wnt5A_Cond_R:<br>GGCTCCCTCAGTCAGTGTTCAT                    | Miyoshi et al., 2012                                                              | N/A          |
| Wnt5A_Neo_F:<br>GACTCAACAGCATTGAGACATGTTTGT                | Miyoshi et al., 2012                                                              | N/A          |
| OsterixCreTransgene_F:<br>GAGAATAGGAAGTTCGGAATAGTAAC       | <a href="https://www.jax.org/strain/006361">https://www.jax.org/strain/006361</a> | N/A          |
| OsterixCreTransgene_R:<br>CCCTGGAAGTGACTAGCATTG            | <a href="https://www.jax.org/strain/006361">https://www.jax.org/strain/006361</a> | N/A          |
| OsterixCreInternControl_F:<br>AGAGAGCTCCCCTCAATTATGT       | <a href="https://www.jax.org/strain/006361">https://www.jax.org/strain/006361</a> | N/A          |
| OsterixCreInternControl_R:<br>AGCCACTTCTAGCACAAAGAACT      | <a href="https://www.jax.org/strain/006361">https://www.jax.org/strain/006361</a> | N/A          |
| Mouse: B6.SJL-Ptprca.Pep3b/BoyJ: B6 Cd45.1                 | Jackson Labs                                                                      | MGI: 2164701 |

**Supplementary Table 2:**attached file: **Blood2021-011775 healthy donor and patient characteristics****Supplementary Table 3:**

| <b>Antibodies used in this study</b>                    |                            |                                      |
|---------------------------------------------------------|----------------------------|--------------------------------------|
| CD45 Monoclonal Antibody (30-F11), FITC                 | eBioscience                | Cat#11-0451-82;<br>PRID: AB_465050   |
| CD45 Monoclonal Antibody (30-F11), PE                   | eBioscience                | Cat#12-0451-82;<br>RRID: AB_465668   |
| CD45 Monoclonal Antibody (30-F11), PE-Cyanine5.5        | eBioscience                | Cat#35-0451-82;<br>RRID: AB_469718   |
| CD45 Monoclonal Antibody (30-F11), PE-Cyanine7          | eBioscience                | Cat#25-0451-82;<br>RRID: AB_2734986  |
| CD45 Monoclonal Antibody (30-F11), APC                  | eBioscience                | Cat#17-0451-82;<br>RRID: AB_469392   |
| CD45 Monoclonal Antibody (30-F11), APC-eFluor 780       | eBioscience                | Cat#47-0451-82;<br>RRID: AB_1548781  |
| CD45 Monoclonal Antibody (30-F11), Pacific Blue         | Invitrogen                 | Cat#MCD4528;<br>RRID: AB_10373710    |
| CD3e Monoclonal Antibody (145-2C11), PE-Cyanine5.5      | Invitrogen,<br>eBioscience | Cat#35-0031-82;<br>RRID: AB_11219266 |
| TER-119 Monoclonal Antibody (TER119), PE                | Invitrogen                 | Cat#MA5-17824;<br>RRID: AB_2539207   |
| CD45R (B220) Monoclonal Antibody (RA3-6B2), PE-Cyanine7 | Invitrogen                 | Cat#25-0452-81;<br>RRID: AB_469627   |
| Ly-6G/Ly-6C Monoclonal Antibody (RB6-8C5), Pacific Blue | Invitrogen                 | Cat#RM3028;<br>RRID: AB_10376182     |
| CD11b Monoclonal Antibody (M1/70), APC-Cyanine7         | Invitrogen                 | Cat#A15390;<br>RRID: AB_2534404      |

|                                                        |                            |                                      |
|--------------------------------------------------------|----------------------------|--------------------------------------|
| CD45.1 Monoclonal Antibody (A20), FITC                 | Invitrogen,<br>eBioscience | Cat#11-0453-82;<br>RRID: AB_465058   |
| CD45.2 Monoclonal Antibody (104), PE                   | Invitrogen,<br>eBioscience | Cat#12-0454-81;<br>RRID: AB_465678   |
| CD45.2 Monoclonal Antibody (104), eFluor 450           | Invitrogen,<br>eBioscience | Cat#48-0454-82;<br>RRID: AB_11042125 |
| CD117 (c-Kit) Monoclonal Antibody (2B8), PE            | Invitrogen,<br>eBioscience | Cat#12-1171-82;<br>RRID: AB_465813   |
| CD34 Monoclonal Antibody (RAM34), FITC                 | Invitrogen,<br>eBioscience | Cat#11-0341-81;<br>RRID: AB_465021   |
| CD34 Monoclonal Antibody (RAM34), eFluor 450           | Invitrogen,<br>eBioscience | Cat#48-0341-82;<br>RRID: AB_2043837  |
| CD150 Monoclonal Antibody (9D1), APC                   | Invitrogen,<br>eBioscience | Cat#17-1501-63;<br>RRID: AB_469440   |
| Ly-6A/E (Sca-1) Monoclonal Antibody (D7), PE-Cyanine7  | Invitrogen,<br>eBioscience | Cat#25-5981-81;<br>RRID: AB_469669   |
| c-Kit Monoclonal Antibody (2B8), APC-Cyanine7          | Invitrogen                 | Cat#A15423;<br>RRID: AB_2534436      |
| CD150 Monoclonal Antibody (9D1), PE                    | Invitrogen,<br>eBioscience | Cat#12-1501-82;<br>RRID: AB_465873   |
| TER-119 Monoclonal Antibody (Ter119), PE-Cy5.5         | Invitrogen,<br>eBioscience | Cat#35-5921-82;<br>PRID: AB_469738   |
| CD31 (PECAM-1) Monoclonal Antibody (390), APC          | Invitrogen,<br>eBioscience | Cat#17-0311-82;<br>RRID: AB_657735   |
| CD144 (VE-cadherin) Monoclonal Antibody (eBioBV13), PB | Invitrogen,<br>eBioscience | Cat#14-1441-82;<br>PRID: AB_842767   |
| CD166 (ALCAM) Monoclonal Antibody (eBioALC48), PE      | Invitrogen,<br>eBioscience | Cat#12-1661-81;<br>RRID: AB_823125   |
| TER-119 Monoclonal Antibody (TER119), Biotin           | Invitrogen                 | Cat#MA5-17819;<br>RRID: AB_2539203   |

|                                                             |                         |                                   |
|-------------------------------------------------------------|-------------------------|-----------------------------------|
| CD51 (Integrin alpha V) Monoclonal Antibody (RMV-7), Biotin | Invitrogen, eBioscience | Cat#13-0512-85; RRID: AB_466477   |
| CD41 Monoclonal Antibody (MWReg30), Biotin                  | Invitrogen              | Cat#MA1-82655; RRID: AB_928291    |
| CD48 Monoclonal Antibody (HM48-1), Biotin                   | Invitrogen, eBioscience | Cat#13-0481-82; RRID: AB_466470   |
| CD11b Monoclonal Antibody (M1/70), Biotin                   | Invitrogen, eBioscience | Cat#13-0112-85; RRID: AB_466359   |
| CD5 Monoclonal Antibody (53-7.3), Biotin                    | Invitrogen, eBioscience | Cat#13-0051-81; RRID: AB_466338   |
| CD8a Monoclonal Antibody (53-6.7), Biotin                   | Invitrogen, eBioscience | Cat#13-0081-82; RRID: AB_466346   |
| CD45R (B220) Monoclonal Antibody (RA3-6B2), Biotin          | Invitrogen, eBioscience | Cat#13-0452-82; RRID: AB_466449   |
| Ly-6G/Ly-6C Monoclonal Antibody (RB6-8C5), Biotin           | Invitrogen, eBioscience | Cat#13-5931-86; RRID: AB_466802   |
| Mouse Hematopoietic Lineage Biotin Panel                    | Invitrogen, eBioscience | Cat#88-7774-75; RRID: AB_476399   |
| Streptavidin eFluor™ 450 Conjugate                          | eBioscience             | Cat#48-4317-82; RRID: AB_10359737 |
| Streptavidin, APC-Alexa Fluor™ 750                          | Invitrogen              | Cat#SA1027; RRID: AB_2716627      |
| Anti-mouse CD150 (SLAM) Antibody (TC15-12F12.2), PE         | BioLegend               | Cat#115904; RRID: AB_313683       |
| Goat anti Mouse/Rat FABP4/A-FABP Antibody                   | R&D Systems             | Cat#AF1443-SP; RRID: AB_2102444   |
| Alexa Fluor® 647 AffiniPure Donkey Anti-Goat IgG (H+L)      | Jackson ImmunoResearch  | Cat#705-605-003; RRID: AB_2340436 |

|                                                                                                 |                             |                                  |
|-------------------------------------------------------------------------------------------------|-----------------------------|----------------------------------|
| Anti-phospho-Histone H2A.X (Ser139) Antibody (JBW301); mouse                                    | Sigma-Aldrich               | Cat#05-636; PRID: AB_309864      |
| 53BP1 Antibody, rabbit                                                                          | Novus Biologicals           | Cat#NB100-304SS; PRID: AB_920462 |
| LAMP-1 Antikörper (1D4B); mouse                                                                 | Santa Cruz                  | Cat#sc-19992; PRID: AB_2134495   |
| LC3B Antibody; rabbit                                                                           | Cell Signaling Technologies | Cat#2775; PRID: AB_915950        |
| Phalloidin-iFluor 488 Reagent; conjugated iFluor 488                                            | abcam                       | Cat#ab176753; PRID: N/A          |
| Atg7 (D12B11) mAb; rabbit                                                                       | Cell Signaling Technologies | Cat#8558; PRID: AB_10831194      |
| Anti-Drp1 Clone 22/Drp1 (RUO); mouse                                                            | BDBiosciences               | Cat#611738; PRID: AB_399214      |
| Wnt-5a Antibody; goat                                                                           | R&D Systems                 | Cat#AF645; PRID: AB_2288488      |
| Active Cdc42-GTP; mouse                                                                         | NewEast Bioscience          | Cat#26905; PRID: AB_1961759      |
| Recombinant Anti-TOMM20 antibody [EPR15581-54] - Mitochondrial Marker (Alexa Fluor® 555); mouse | abcam                       | Cat#ab221292; PRID: N/A          |
| Human/Mouse/Rat p62/SQSTM1 Antibody; mouse                                                      | R&D Systems                 | Cat#MAB8028; PRID: N/A           |
| CD41 Monoclonal Antibody (eBioMWReg30) eFluor 450                                               | eBioscience                 | Cat#48-0411-82 PRID: AB_1582238  |
| CD42b Monoclonal Antibody (HIP1), APC                                                           | eBioscience                 | Cat#17-0429-42 PRID: AB_2573146  |
| Human Wnt-5a Antibody; rat                                                                      | R&D Systems                 | Cat#MAB645-SP                    |
| Annexin V, FITC conjugate                                                                       | eBioscience                 | Cat#A13199); PRID: N/A           |

|                                                                               |                        |                                      |
|-------------------------------------------------------------------------------|------------------------|--------------------------------------|
| MitoTracker™ Red CMXRos                                                       | Life Technologies      | Cat#M7512                            |
| CM-H2DCFDA (General Oxidative Stress Indicator)                               | Life Technologies      | Cat#C6827                            |
| CYTO-ID® Autophagy detection kit                                              | Enzo Life Sciences     | Cat#ENZ-51031-0050                   |
| Rabbit anti-Goat IgG (H+L) Cross-Adsorbed Secondary Antibody, Alexa Fluor 488 | eBioscience            | Cat#A-11078;<br>PRID: AB_2534122     |
| Donkey anti-Goat IgG (H+L) Cross-Adsorbed Secondary Antibody, Alexa Fluor 594 | Invitrogen             | Cat#A-11058;<br>PRID: AB_2534105     |
| Goat anti-Mouse IgG (H+L) Cross-Adsorbed Secondary Antibody, Alexa Fluor 488  | Invitrogen             | Cat#A-11001;<br>PRID: AB_2534069     |
| Goat anti-Rabbit IgG (H+L) Cross-Adsorbed Secondary Antibody, Alexa Fluor 488 | Invitrogen             | Cat#A-11008;<br>RRID: AB_143165      |
| Goat anti-Mouse IgG (H+L) Cross-Adsorbed Secondary Antibody, Alexa Fluor 594  | Invitrogen             | Cat#A-11005;<br>RRID: AB_2534073     |
| Donkey Anti-Goat IgG AffiniPure (H+L), Alexa Fluor® 647                       | Jackson ImmunoResearch | Cat#705-605-003;<br>PRID: AB_2340436 |
| Goat anti-rat IgG (H+L) Cross-Adsorbed Secondary Antibody, Alexa Fluor 488    | Invitrogen             | Cat#A-11006;<br>RRID: AB_2534074     |

**Supplementary Table 4**

| <b>Software and Algorithms</b> |                 |                                                                                                                                                                                                                                                                                       |
|--------------------------------|-----------------|---------------------------------------------------------------------------------------------------------------------------------------------------------------------------------------------------------------------------------------------------------------------------------------|
| ImageJ Software                | ImageJ NIH      | <a href="https://imagej.nih.gov/ij/">https://imagej.nih.gov/ij/</a>                                                                                                                                                                                                                   |
| Software Version Summit 4.4    | Beckman Coulter | <a href="https://www.bioz.com/result/summit%20software/product/Beckman%20Coulter">https://www.bioz.com/result/summit%20software/product/Beckman%20Coulter</a>                                                                                                                         |
| FACS Diva Software v8.0        | BD Biosciences  | <a href="https://www.bdbiosciences.com/en-us/instruments/research-instruments/research-software/flow-cytometry-acquisition/facsdiva-software">https://www.bdbiosciences.com/en-us/instruments/research-instruments/research-software/flow-cytometry-acquisition/facsdiva-software</a> |
| FlowJo 8.8.6                   | BD Biosciences  | <a href="https://www.flowjo.com">https://www.flowjo.com</a>                                                                                                                                                                                                                           |

## References to online supplement

1. Oostendorp RA, Medvinsky AJ, Kusadasi N, et al. Embryonal subregion-derived stromal cell lines from novel temperature-sensitive SV40 T antigen transgenic mice support hematopoiesis. *J Cell Sci.* 2002;115(Pt 10):2099-2108.
2. Liu W, Du W, Shang X, et al. Rational identification of a Cdc42 inhibitor presents a new regimen for long-term hematopoietic stem cell mobilization. *Leukemia.* 2019;33(3):749-761.
3. Zambetti NA, Ping Z, Chen S, et al. Mesenchymal Inflammation Drives Genotoxic Stress in Hematopoietic Stem Cells and Predicts Disease Evolution in Human Pre-leukemia. *Cell Stem Cell.* 2016;19(5):613-627.
4. Garcia-Mata R, Boulter E, BurrIDGE K. The 'invisible hand': regulation of RHO GTPases by RHOGDIs. *Nat Rev Mol Cell Biol.* 2011;12(8):493-504.
